# Supplementary material for: Highly efficient and stable quantum dot light-emitting devices with a low-temperature tin oxide electron transport layer
Source: Royal Society of Chemistry journal article supplement (doi:10.1039/d1tc03073f), 2021-01-01
Supplement: d1tc03073f1.pdf [file d1tc03073f1.pdf]

## *Supporting information*

### **Highly efficient and stable quantum dot light-emitting devices with low-temperature tin oxide electron transport layer**

Haiwei Feng, Shihao Liu, Ge Tang, Letian Zhang\*, Wenfa Xie\*

State Key Laboratory of Integrated Optoelectronics, College of Electronic Science and Engineering, Jilin University, Changchun, 130012, People's Republic of China

\*Corresponding authors: [zlt@jlu.edu.cn](mailto:zlt@jlu.edu.cn), [xiewf@jlu.edu.cn](mailto:xiewf@jlu.edu.cn)

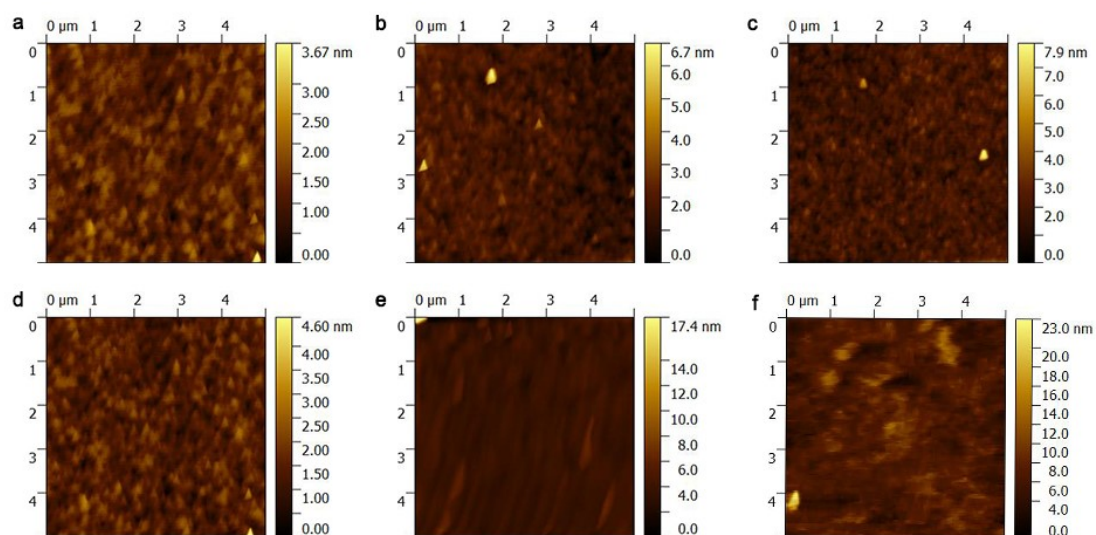

Figure S1 The surface morphology images of ITO/SnO<sub>2</sub> films under the annealing temperature of 120, 140, 160, 180, 200, 260 °C, respectively.

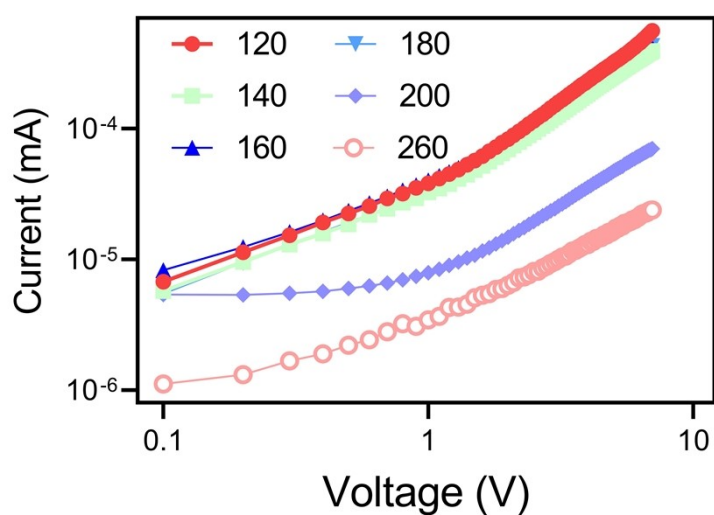

Figure S2 The lateral conductivity of ITO/SnO<sub>2</sub> film with the annealing temperature of 120, 140, 160, 180, 200, and 260 °C, respectively.

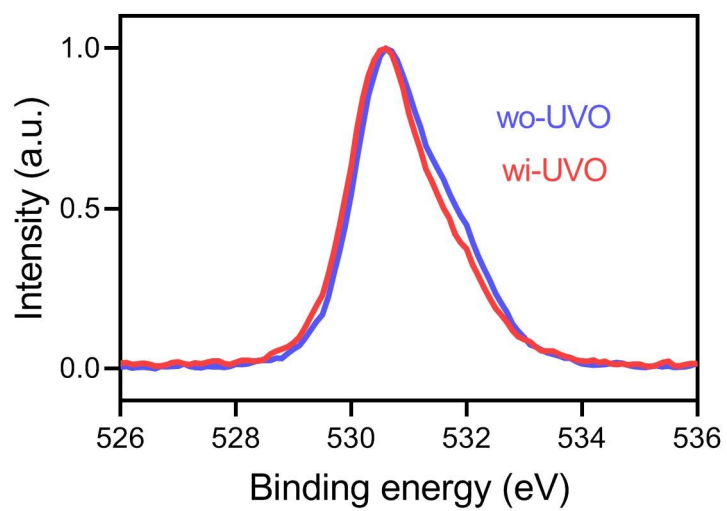

Figure S3 The combined figure of high-resolution O 1s spectra of wo-UVO and the wi-UVO films.
